# Supplementary material for: Structural basis for lipid-mediated activation of G protein-coupled receptor GPR55
Source: Springer Nature journal article supplement (doi:10.1038/s41467-025-57204-y), 2025-02-25
Supplement: MOESM1 [file 41467_2025_57204_MOESM1_ESM.pdf]

## **Structural Basis for Lipid-mediated Activation of G Protein-coupled Receptor GPR55**

Tobias Claff<sup>1</sup>, Rebecca Ebenhoch<sup>1</sup>, Jörg T. Kley<sup>1</sup>, Aniket Magarkar<sup>1</sup>, Herbert Nar<sup>1</sup>, Dietmar Weichert<sup>1\*</sup>

<sup>1</sup>*Boehringer Ingelheim Pharma GmbH & Co. KG, Global Medicinal Chemistry, Birkendorfer Str. 65, 88397 Biberach an der Riß*

*\*Corresponding author: [dietmar.weichert@boehringer-ingelheim.com](mailto:dietmar.weichert@boehringer-ingelheim.com)*

## Table of contents

### Supplementary Figures

|            |                                                                                                            |
|------------|------------------------------------------------------------------------------------------------------------|
| Figure S1  | Expression and purification of the GPR55-G $\alpha_{13}\beta_1\gamma_2$ -ScFv16 complex with LPI and ML184 |
| Figure S2  | Cryo-EM data processing workflow                                                                           |
| Figure S3  | Cryo-EM Map of ligand binding pockets and ECL2 residues                                                    |
| Figure S4  | Dose-response curves of G protein dissociation assays                                                      |
| Figure S5  | Location of LPI and the palmitoyl-tail in the ligand binding pocket                                        |
| Figure S6  | N-linked glycosylation in the GPR55-ML184-structure with two initial GlcNAc units                          |
| Figure S7  | Models of G152 single point mutations in the membrane opening                                              |
| Figure S8  | Comparison of conserved activation microswitches                                                           |
| Figure S9  | Ligand recognition of selected different lipid receptors through their negatively charged moieties         |
| Figure S10 | Equilibration status of molecular dynamics (MD) simulations                                                |

### Supplementary Tables

|          |                                                                                                                |
|----------|----------------------------------------------------------------------------------------------------------------|
| Table S1 | List of GPCR structures determined in complex with G $\alpha_{12}$ or G $\alpha_{13}$ proteins as of May 2024. |
| Table S2 | Cryo-EM data collection, refinement and validation statistics                                                  |
| Table S3 | G protein dissociation assay results                                                                           |
| Table S4 | GPCR structures with resolved N- or O-linked glycosylation in the PDB as of December 2023.                     |

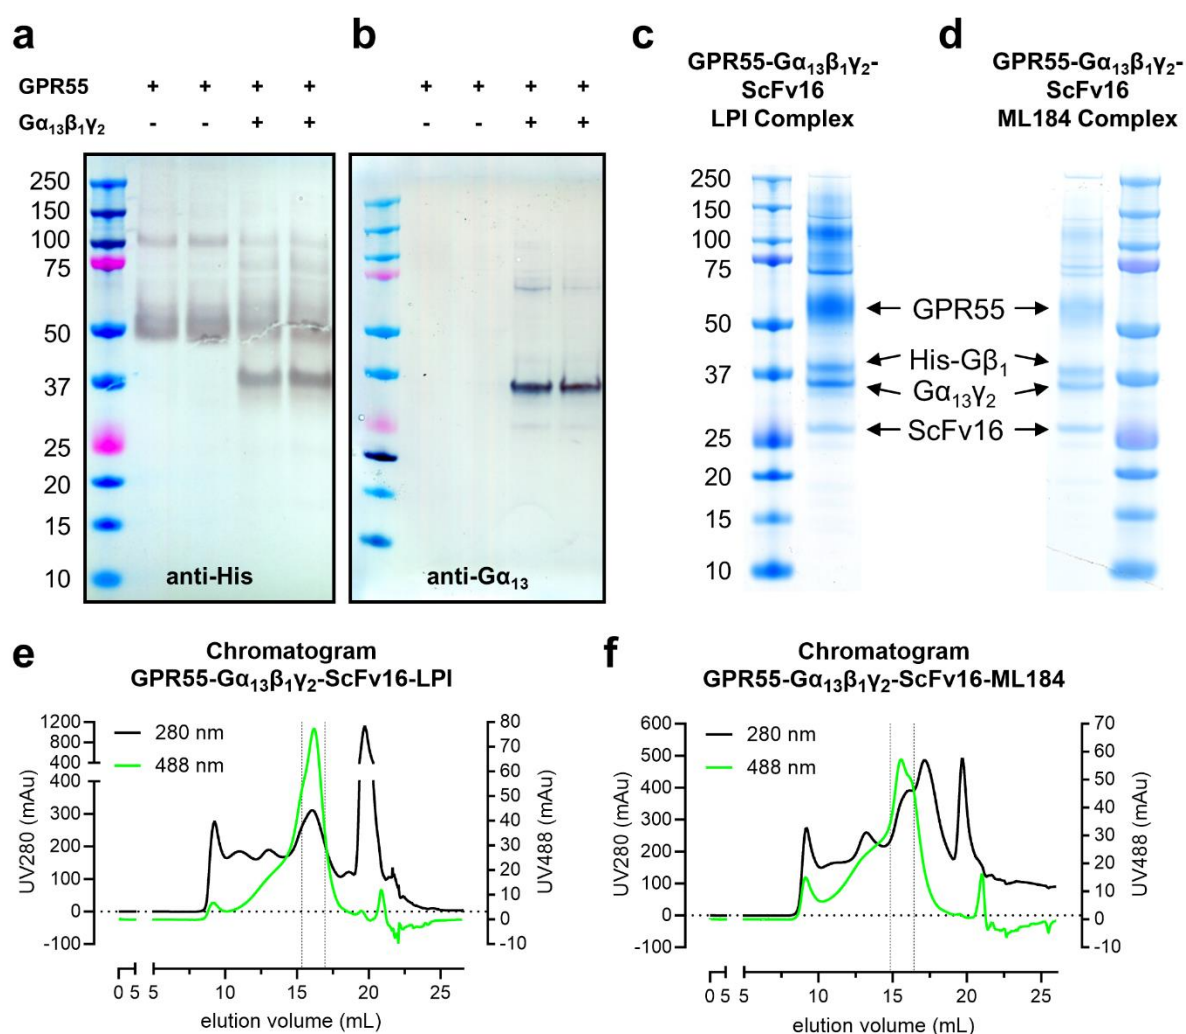

**Supplementary Fig. S1. Expression and purification of the GPR55- $\alpha_{13}\beta_1\gamma_2$ -ScFv16 complex with LPI and ML184.** **a** and **b** Western blot of Hi5 insect cell lysates expressing GPR55 alone or together with heterotrimeric G protein using **a** anti-His antibody or **b** anti- $\alpha_{13}$  antibody. **c** and **d** SDS-PAGE analysis of the final protein used for cryo-EM grid preparation for the **c** GPR55- $\alpha_{13}\beta_1\gamma_2$ -ScFv16-LPI complex or **d** GPR55- $\alpha_{13}\beta_1\gamma_2$ -ScFv16-ML184 complex. **e** and **f** Chromatogram of the **e** GPR55- $\alpha_{13}\beta_1\gamma_2$ -ScFv16-LPI complex or **f** GPR55- $\alpha_{13}\beta_1\gamma_2$ -ScFv16-ML184 during purification using a Superose<sup>TM</sup> 6 Increase 10/300 GL column on an ÄKTA pure<sup>TM</sup> chromatography system (Cytiva) equipped with a 10 mm flow cell. Peak fractions for each complex were pooled according to the GFP absorption peak at 488 nm as indicated by vertical dotted lines.

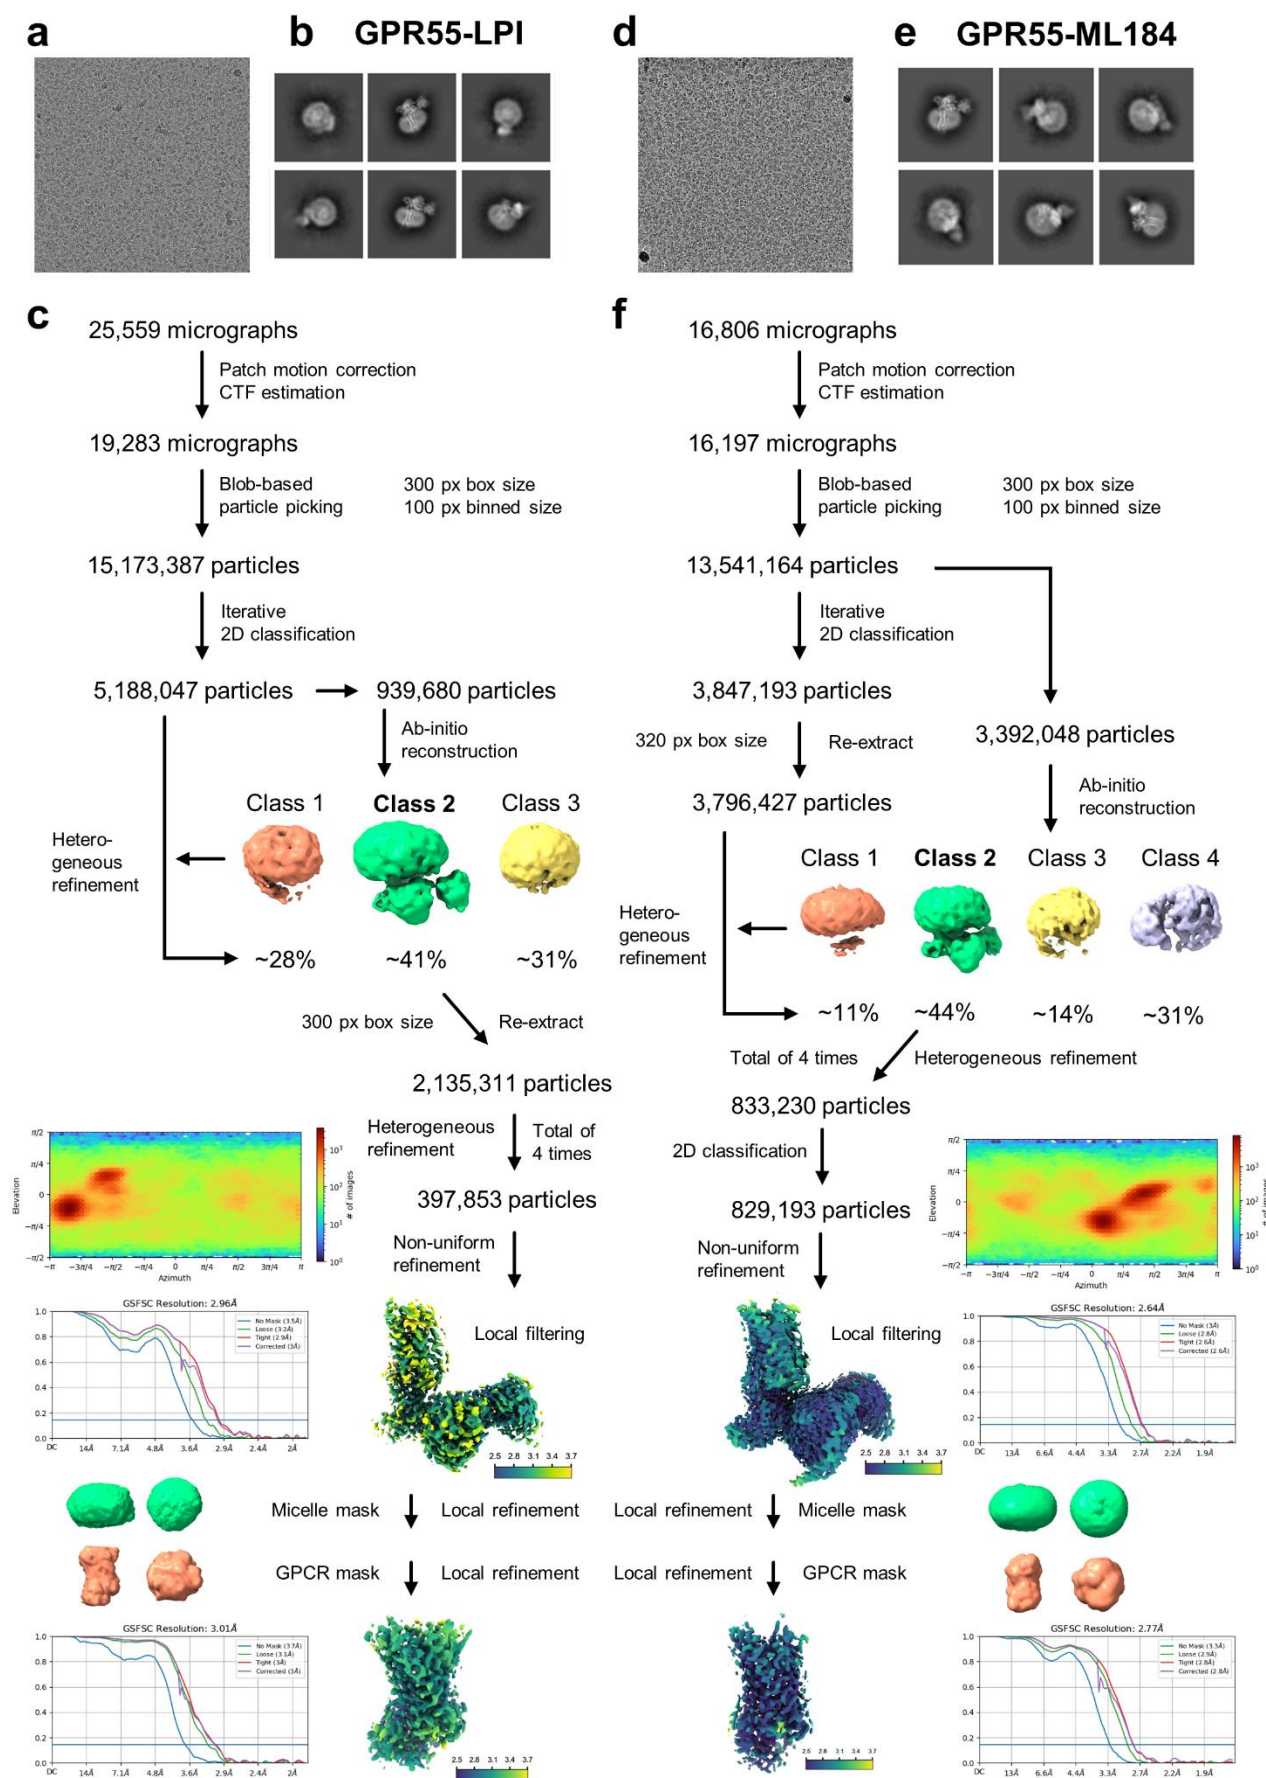

**Supplementary Fig. S2. Cryo-EM data processing workflow.**



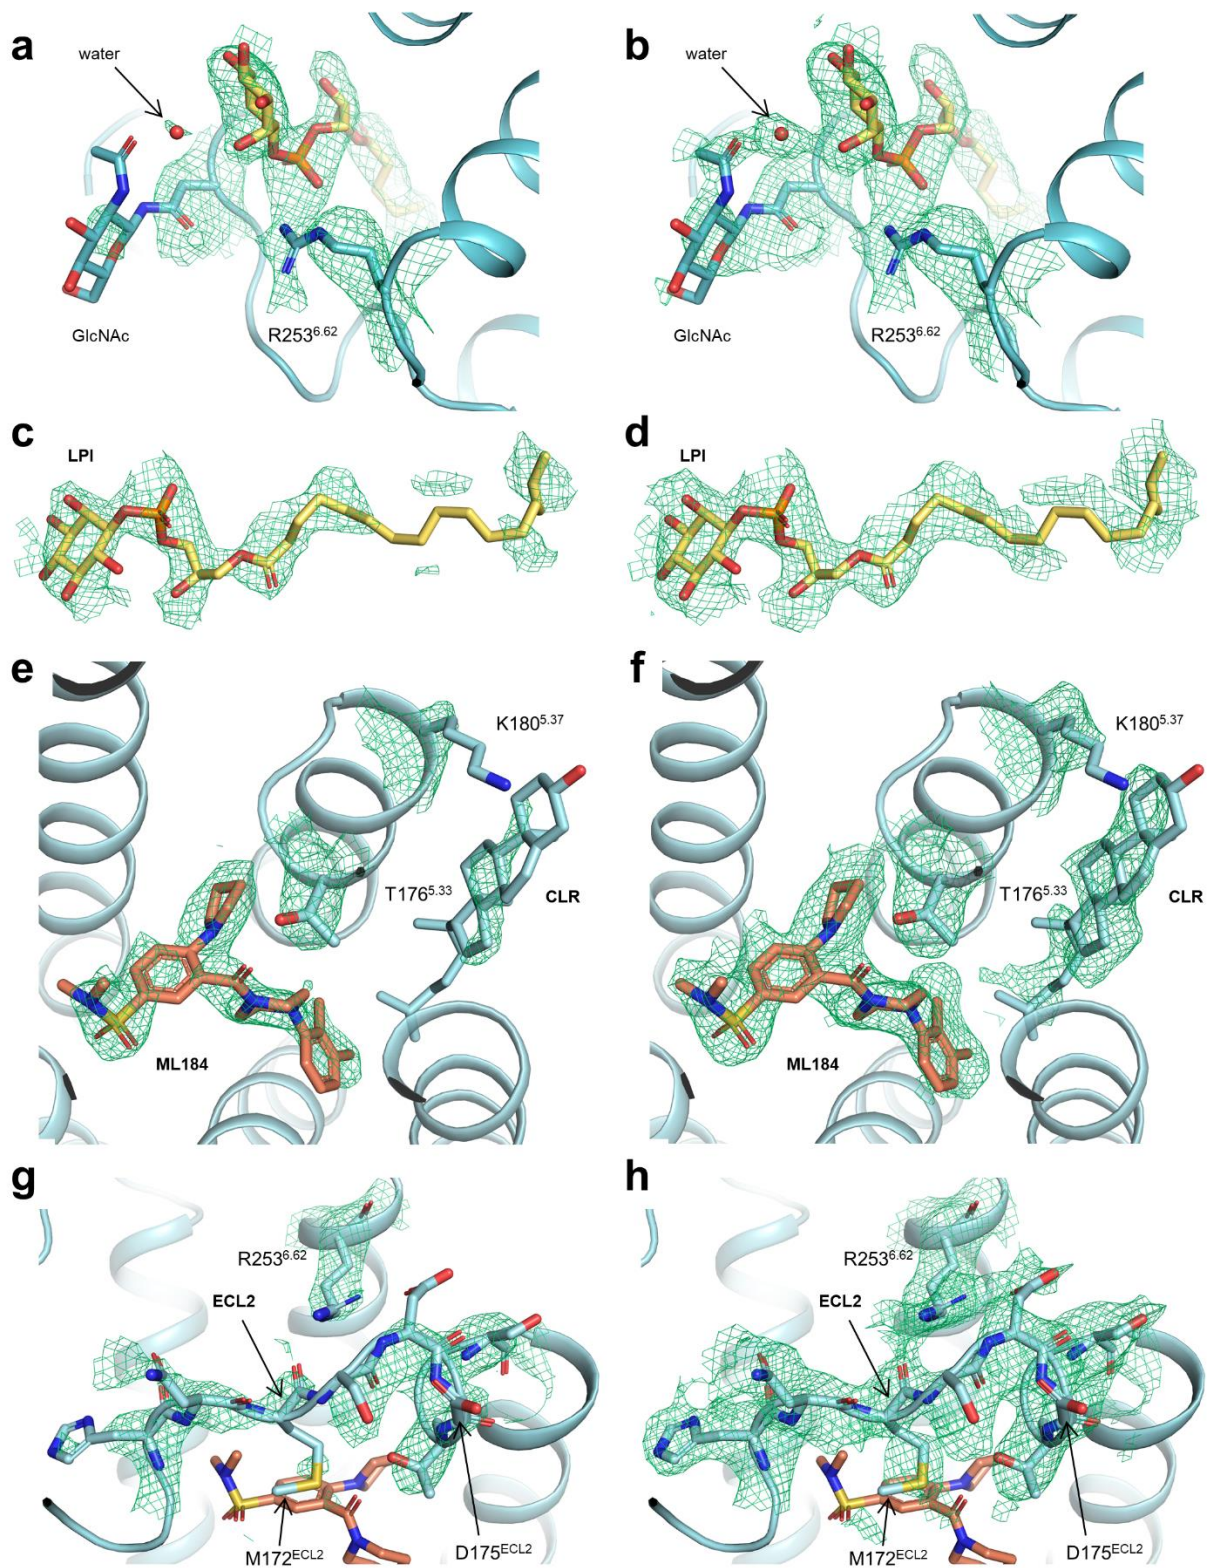

**Supplementary Fig. S3. Cryo-EM Map of ligand binding pockets and ECL2 residues.** **a, b** Cryo-EM map of the extracellular ends of LPI, GlcNAc, N171, and R253 at two different contour levels. **c, d** Cryo-EM map of LPI at two different contour levels. **e, f** Cryo-EM map of ML184, T176, CLR, and K180 at two different contour levels. **g, h** Cryo-EM map of ECL2 residues between S178 and H170 and R253 of the ML184 structure at two different contour levels.

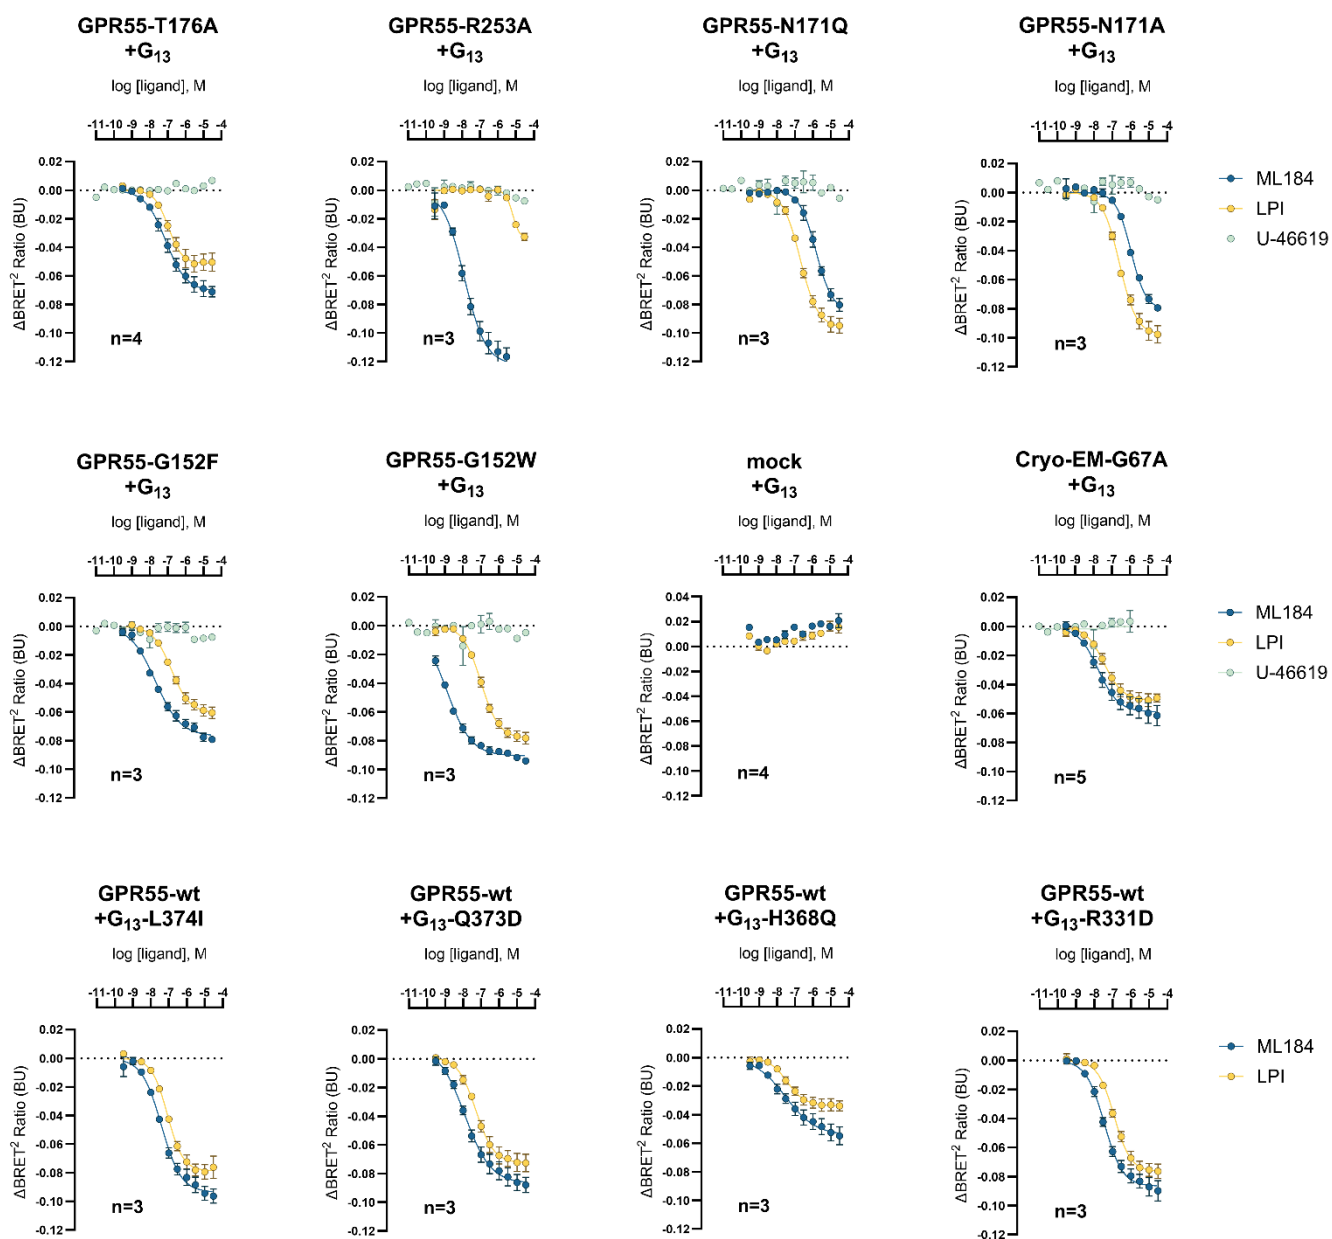

**Supplementary Fig. S4. Dose-response curves of G protein dissociation assays.** Data points represent means  $\pm$  SEM from 3-7 independent experiments as indicated in Supplementary Table S3. Data of the negative control ligand U-46619 at GPR55 mutants represent means  $\pm$  SEM from only two independent experiments.

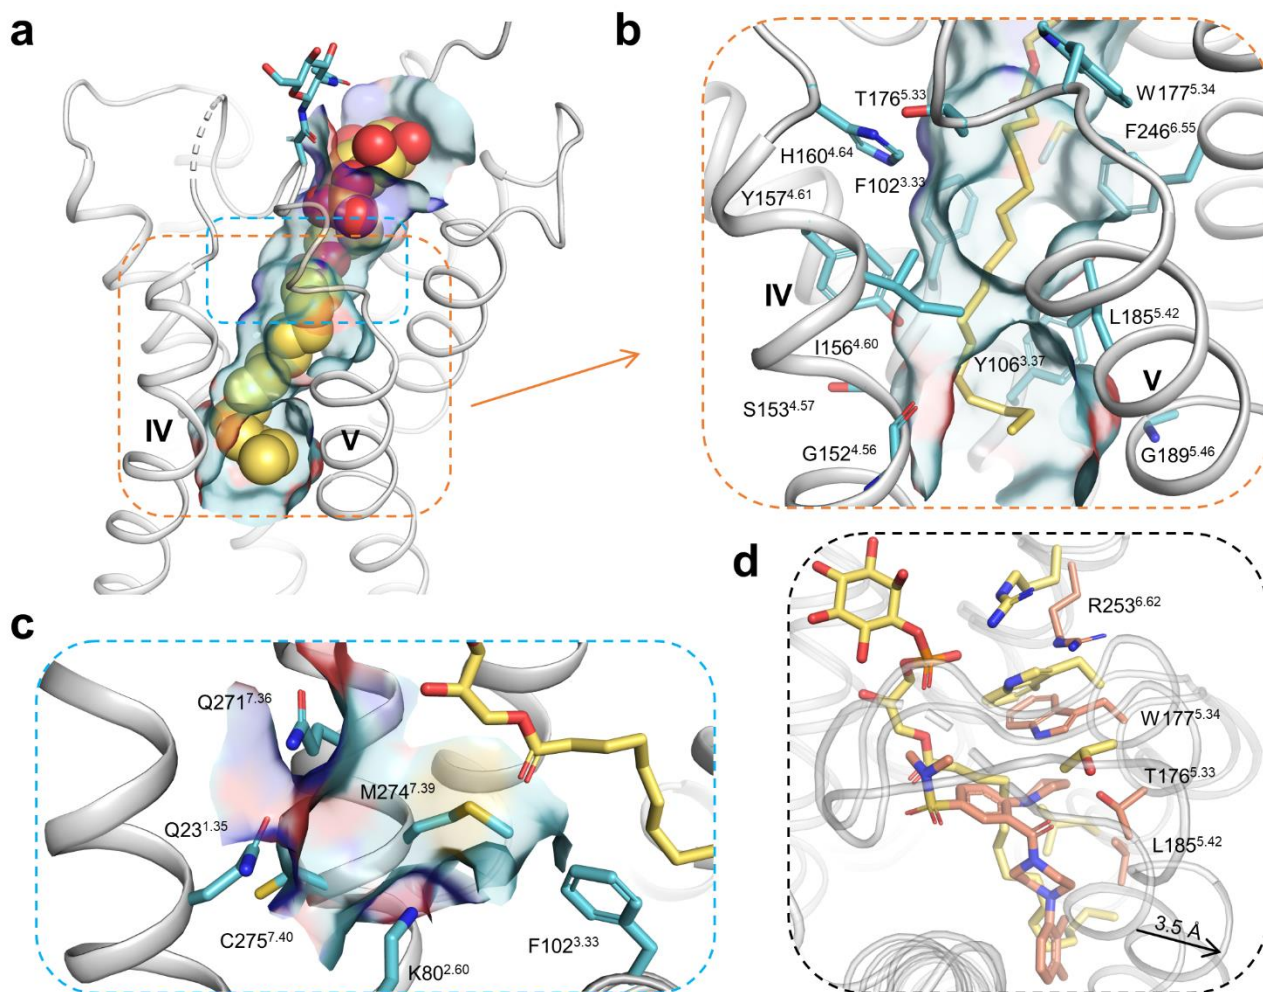

**Supplementary Fig. S5. Location of LPI and the palmitoyl-tail in the ligand binding pocket.** **a** Overview of the binding position of LPI (yellow spheres) in GPR55. **b** Magnified image of the binding pocket of the lipophilic palmitoyl-tail of LPI (yellow sticks) in the binding channel highlights the contacting amino acids. The binding pocket surface of LPI is shown in cyan in both panels. **c** Magnified image of the receptor cavity facing the glycerol hydroxy group. **d** Structural comparison of the binding pockets of LPI (yellow sticks) and ML184 (salmon sticks) shows rearrangements of several residues and an outward movement of the extracellular end of helix V to accommodate ML184.



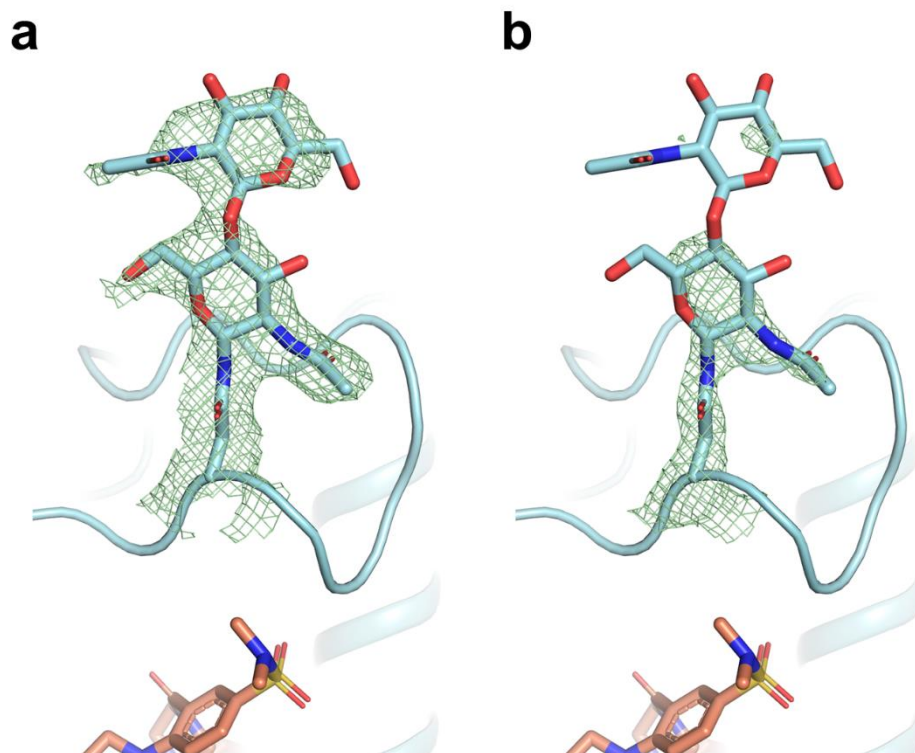

**Supplementary Figure S6. N-linked glycosylation in the GPR55-ML184-structure with two initial GlcNAc units. a and b** Cryo-EM map of N171<sup>ECL2</sup> and the adjacent two glycan units are displayed with green mesh at different contour levels.



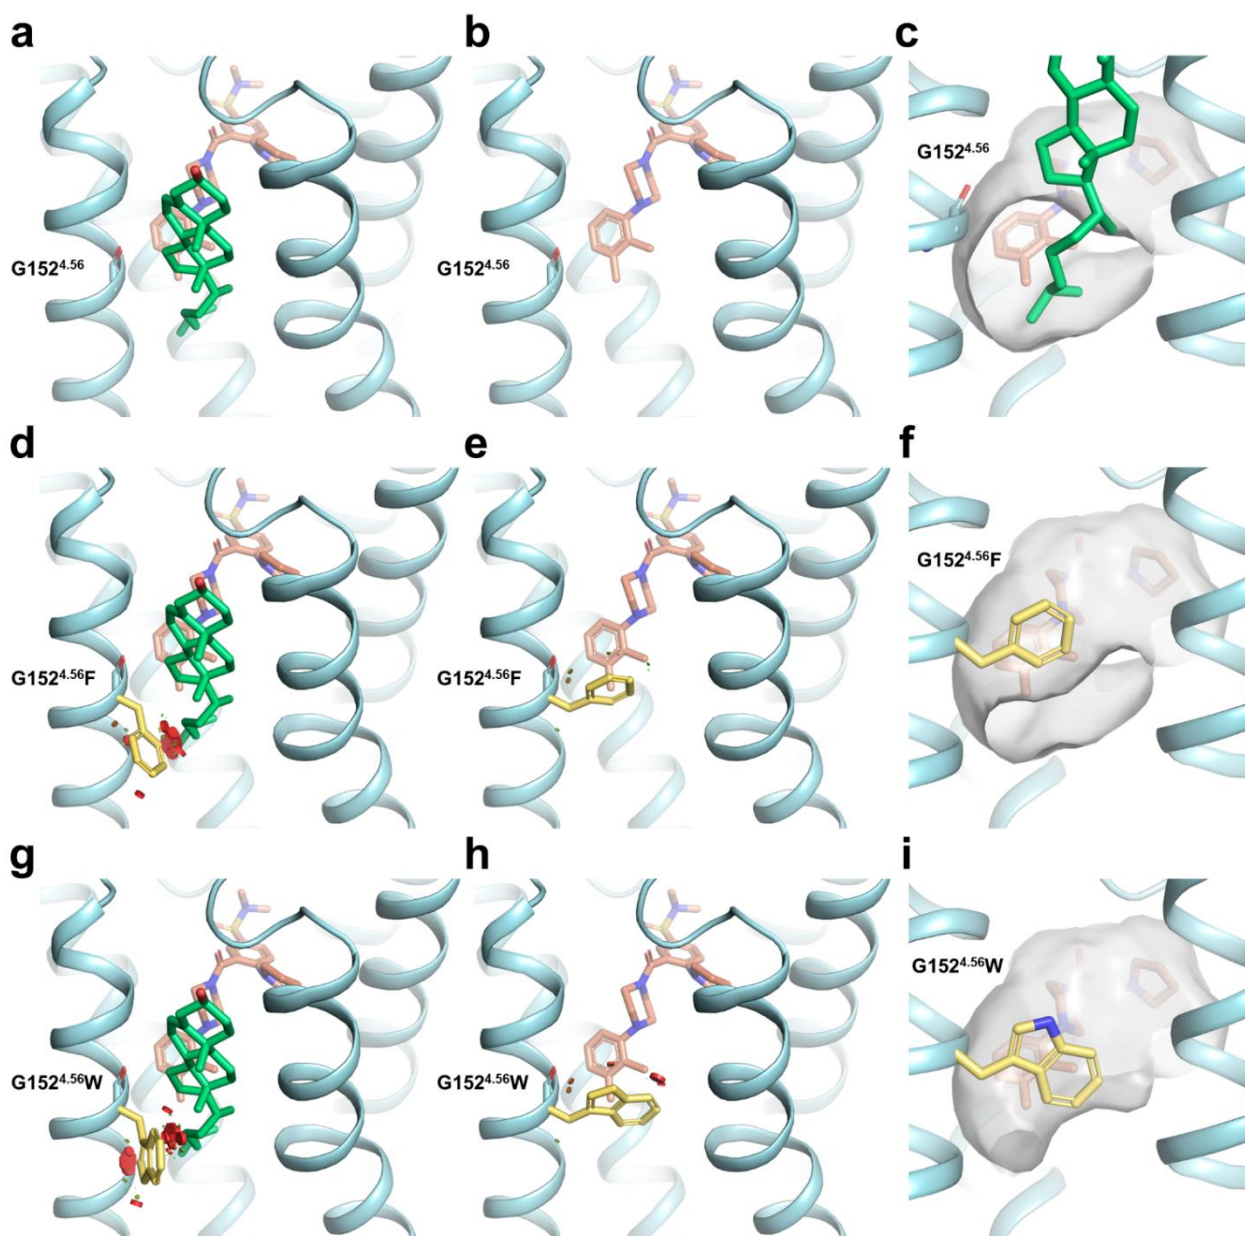

**Supplementary Fig. S7. Models of G152 single point mutations in the membrane opening.** The figure shows the membrane opening between helices IV and V **a, d, g** with CLR (green sticks) present and clashes displayed, **b, e, h** with CLR removed and clashes displayed, and **c, f, i** wt receptor or final models with ML184 (salmon sticks) surface displayed in gray. **a – c** shows the native receptor without mutation, **d – f** shows the receptor with G152<sup>4.56</sup>F mutation, and **g – i** shows the receptor with G152<sup>4.56</sup>W mutation (side chains shown as yellow sticks). Red disks indicate steric clashes. Point mutations of G152<sup>4.56</sup> to either F or W were introduced using PyMOL.

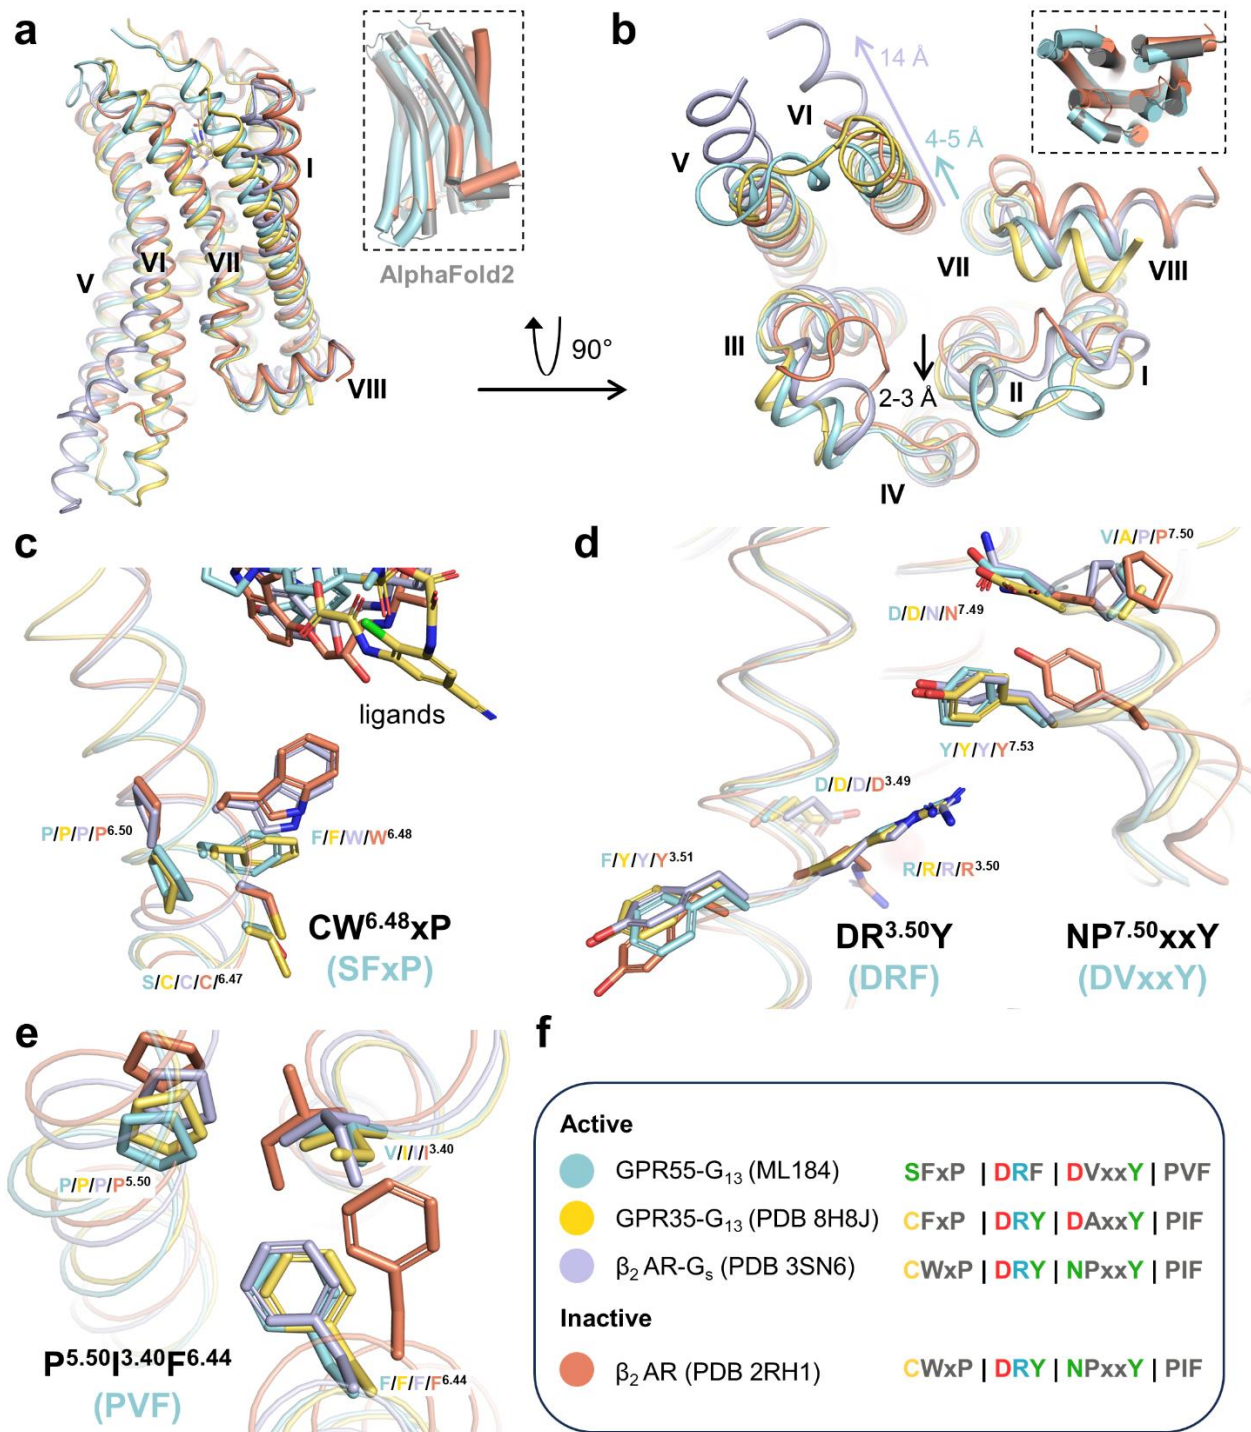

**Supplementary Fig. S8. Comparison of conserved activation microswitches.** Superimposition of GPR55-G<sub>13</sub> (active structure, blue), GPR35-G<sub>13</sub> (active structures, yellow, PDB 8H8J), β<sub>2</sub> adrenergic receptor (active structure, violet, PDB 3SN6), β<sub>2</sub>AR (inactive structure, orange, PDB 2RH1). An inactive state AlphaFold model from GPCRdb (gray) is superimposed separately (rectangle box) with GPR55 and the inactive β<sub>2</sub>AR using a cylindrical helix representation. **a** Alignment focused on the transmembrane helices. **b** Intracellular view of the helix bundle highlights minor outward helix IV outward movement of GPR55 in comparison to the inactive state structure. Different activation microswitches were compared focused on **c** CWxP motif, **d** DRY and NPxxY motif, and **e** PIF motif. **f** Color coding and sequence alignment of compared microswitches between all four receptors.



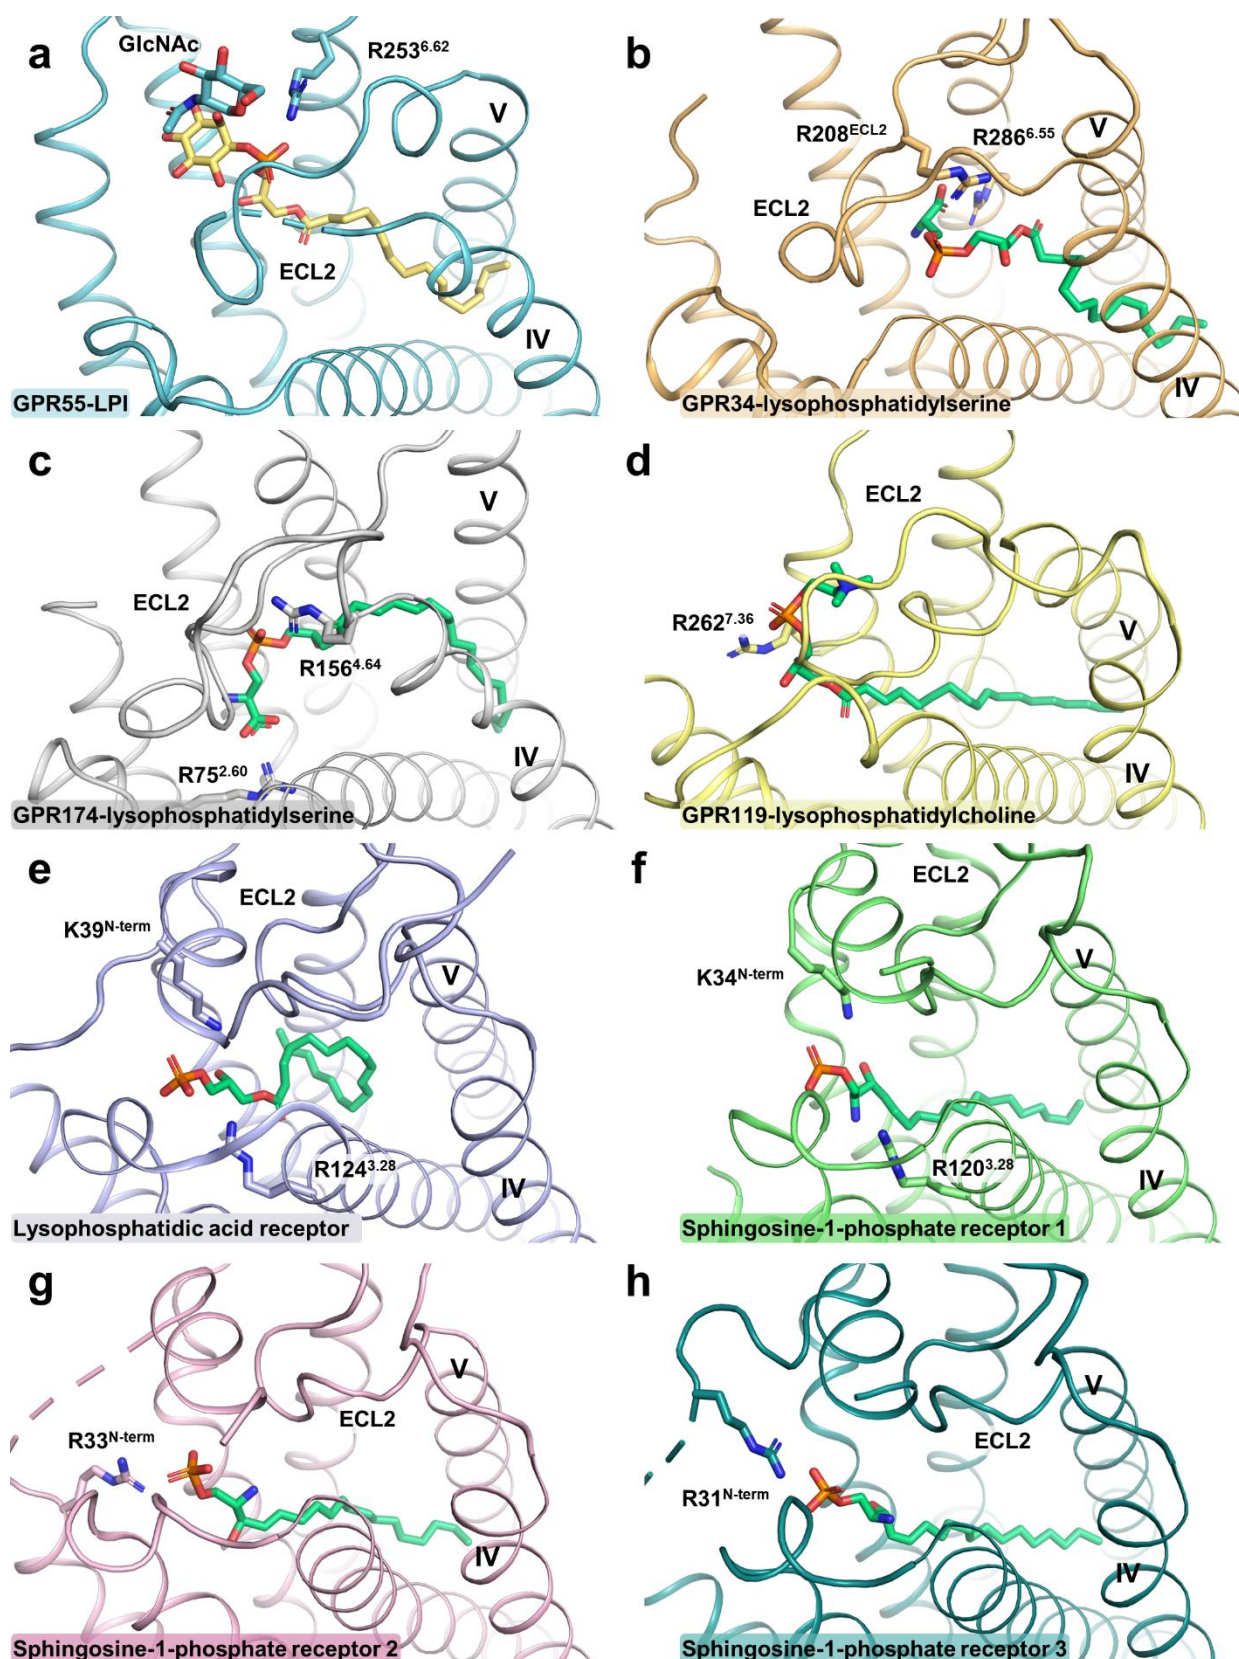

**Supplementary Fig. S9. Ligand recognition of selected different lipid receptors through their negatively charged moieties.** GPCR-lipid interactions of **a** GPR55-LPI (this study), **b** GPR34-LPS (PDB 8SAI), **c** GPR174-LPS (PDB 7XV3), **d** GPR119-LPC (PDB 7XZ5), **e** LPAR<sub>1</sub>-LPA (PDB 7TD0), **f – h** and S1P<sub>1-3</sub>-S1P (PDB 7VIE, 7T6B, and 7EW3). The same perspective was used for all binding pockets.

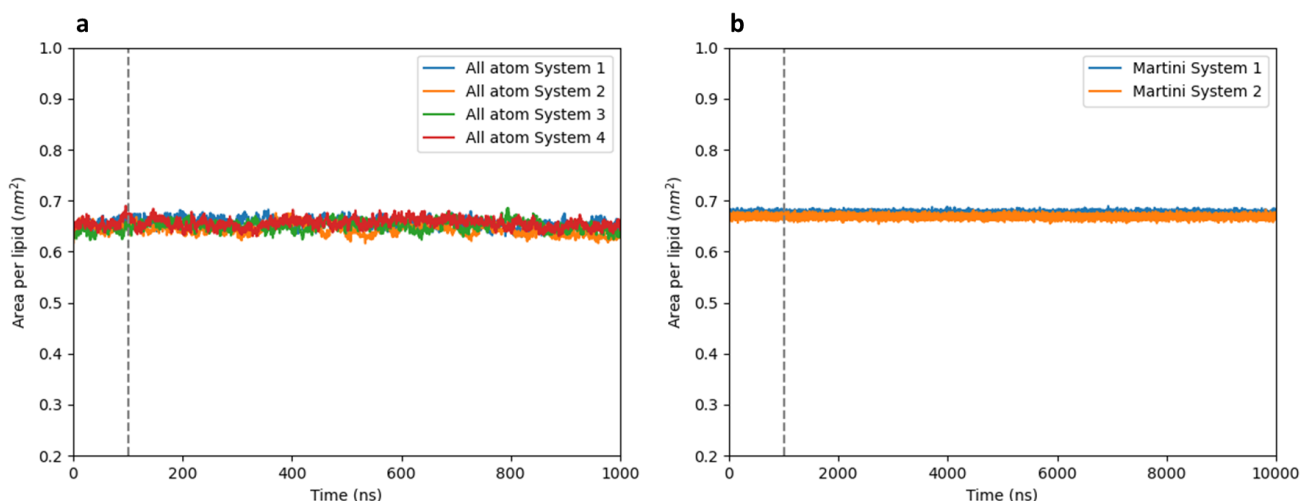

**Supplementary Fig. S10. Equilibration status of molecular dynamics (MD) simulations.**

The equilibration of the MD systems is illustrated by a plot showing the area per lipid over time for the all-atom **a**, and martini simulations **b**. The naming conventions for the systems align with those detailed in the Methods section. The area per lipid is calculated as simulation box dimension x, multiplied by simulation box dimension y and divided by the number of DOPC and Cholesterol molecules in a single leaflet of lipid bilayer. **a** The all-atom simulations were conducted over a period of 1 microsecond ( $\mu$ s), with the initial 100 nanoseconds (ns) serving as the equilibration phase. The subsequent 900 ns were used for analysis. A dotted vertical line marks the transition from equilibration to analysis. **b** In case of the martini simulations, the first 1  $\mu$ s was dedicated to equilibration, followed by a 9  $\mu$ s period for analysis. The transition from equilibration to analysis is indicated by a dotted vertical line.



**Supplementary Table S1. List of GPCR structures determined in complex with Gα<sub>12</sub> or Gα<sub>13</sub> proteins as of July 2024.**

| Receptor                               | Abbreviation       | Family           | G protein subtype      | Ligand       | PDB ID      | FSC Resolution |
|----------------------------------------|--------------------|------------------|------------------------|--------------|-------------|----------------|
| Adhesion G protein-coupled receptor L3 | AGRL3              | Adhesion         | Gα <sub>13</sub>       | apo          | 7SF7        | 2.90 Å         |
| Adhesion G protein-coupled receptor G1 | AGRG1              | Adhesion         | Gα <sub>13</sub>       | apo          | 7SF8        | 2.70 Å         |
| Sphingosine-1-phosphate receptor 2     | S1P <sub>2</sub> R | Rhodopsin        | Gα <sub>13</sub>       | S1P          | 7T6B        | 3.19 Å         |
| Adhesion G protein-coupled receptor F1 | AGRF1              | Adhesion         | Gα <sub>13</sub>       | apo          | 7WY0        | 2.83 Å         |
| Adhesion G protein-coupled receptor F1 | AGRF1              | Adhesion         | Gα <sub>12</sub>       | apo          | 7WZ7        | 2.83 Å         |
| Adhesion G protein-coupled receptor L3 | AGRL3              | Adhesion         | Gα <sub>12</sub>       | apo          | 7X10        | 2.93 Å         |
| Adhesion G protein-coupled receptor E5 | AGRE5              | Adhesion         | Gα <sub>13</sub>       | apo          | 7YDH        | 3.10 Å         |
| Adhesion G protein-coupled receptor E5 | AGRE5              | Adhesion         | Gα <sub>12</sub>       | apo          | 7YDJ        | 3.03 Å         |
| GPR35                                  | GPR35              | Rhodopsin        | Gα <sub>13</sub>       | Iodoxamide   | 8H8J        | 3.20 Å         |
| GPR55<br>(this publication)            | <b>GPR55</b>       | <b>Rhodopsin</b> | <b>Gα<sub>13</sub></b> | <b>LPI</b>   | <b>9GE3</b> | <b>2.96 Å</b>  |
| GPR55<br>(this publication)            | <b>GPR55</b>       | <b>Rhodopsin</b> | <b>Gα<sub>13</sub></b> | <b>ML184</b> | <b>9GE2</b> | <b>2.64 Å</b>  |

**Supplementary Table S2. Cryo-EM data collection, refinement and validation statistics.**

|                                                     | <b>GPR55-G<math>\alpha_{13}\beta_1\gamma_2</math>-ScFv16-LPI</b><br>(PDB 9GE3) | <b>GPR55-G<math>\alpha_{13}\beta_1\gamma_2</math>-ScFv16-ML184</b><br>(PDB 9GE2) |
|-----------------------------------------------------|--------------------------------------------------------------------------------|----------------------------------------------------------------------------------|
| <b>Data collection and processing</b>               |                                                                                |                                                                                  |
| Magnification                                       | 130,000                                                                        | 105,000                                                                          |
| Voltage (kV)                                        | 300                                                                            | 300                                                                              |
| Detector                                            | Falcon IV                                                                      | Gatan K3                                                                         |
| Electron exposure (e <sup>-</sup> /Å <sup>2</sup> ) | 40                                                                             | 45                                                                               |
| Defocus range (μm)                                  | -2.54 to -0.40                                                                 | -3.56 to -0.88                                                                   |
| Pixel size (Å)                                      | 0.951                                                                          | 0.829                                                                            |
| Symmetry imposed                                    | C1                                                                             | C1                                                                               |
| Initial particle images (no.)                       | 5,188,047                                                                      | 13,541,164                                                                       |
| Final particle images (no.)                         | 397,853                                                                        | 829,193                                                                          |
| Map resolution (Å)*                                 | 2.87 (composite map)                                                           | 2.51 (composite map)                                                             |
| FSC threshold 0.143                                 | 2.96 (consensus map)                                                           | 2.64 (consensus map)                                                             |
|                                                     | 3.01 (focused map GPCR)                                                        | 2.77 (focused map GPCR)                                                          |
|                                                     | 2.88 (focused map G protein)                                                   | 2.51 (focused map G protein)                                                     |
| <b>Refinement</b>                                   |                                                                                |                                                                                  |
| Initial model used (PDB code)                       | ML184 structure                                                                | AlphaFold (GPR55) & 7YDH                                                         |
| Map sharpening <i>B</i> factor (Å <sup>2</sup> )    | 109.2 (consensus map)                                                          | 98.6 (consensus map)                                                             |
|                                                     | 115.6 (focused map GPCR)                                                       | 102.5 (focused map GPCR)                                                         |
|                                                     | 96.4 (focused map G protein)                                                   | 87.5 (focused map G protein)                                                     |
| <b>Model composition</b>                            |                                                                                |                                                                                  |
| Non-hydrogen atoms                                  | 8,563                                                                          | 9,082                                                                            |
| Protein residues                                    | 1,078                                                                          | 1,137                                                                            |
| Ligands (lipids)                                    | 1 (0)                                                                          | 1 (1)                                                                            |
| Waters                                              | 6                                                                              | 15                                                                               |
| <b><i>B</i> factors (Å<sup>2</sup>)</b>             |                                                                                |                                                                                  |
| Protein                                             | 49.3                                                                           | 37.5                                                                             |
| Ligand                                              | 29.6                                                                           | 17.2                                                                             |
| <b>RMSD</b>                                         |                                                                                |                                                                                  |
| Bond lengths (Å)                                    | 0.002                                                                          | 0.003                                                                            |
| Bond angles (°)                                     | 0.474                                                                          | 0.535                                                                            |
| <b>Validation</b>                                   |                                                                                |                                                                                  |
| MolProbity score                                    | 1.95                                                                           | 1.70                                                                             |
| Clashscore                                          | 8.86                                                                           | 5.11                                                                             |
| Poor rotamers (%)                                   | 3.07                                                                           | 2.82                                                                             |
| <b>Ramachandran plot</b>                            |                                                                                |                                                                                  |
| Favored (%)                                         | 97.46                                                                          | 97.60                                                                            |
| Allowed (%)                                         | 2.54                                                                           | 2.40                                                                             |
| Disallowed (%)                                      | 0                                                                              | 0                                                                                |

**Supplementary Table S3. G protein dissociation assay results.\***

| Receptor/<br>Mutant          | G protein                   | Basal<br>activation<br>± SEM (%) | Ligand  | pEC <sub>50</sub> ± SEM  | Adjusted<br>P value<br>vs. wt <sup>†</sup> | Efficacy ±<br>SEM (%) | No. of<br>independent<br>experiments |
|------------------------------|-----------------------------|----------------------------------|---------|--------------------------|--------------------------------------------|-----------------------|--------------------------------------|
| <b>wt<br/>GPR55</b>          | Gα <sub>13</sub>            | 66 ± 2                           | ML184   | 7.35 ± 0.07              | n.a.                                       | 100 ± 2               | 7                                    |
|                              |                             |                                  | LPI     | 7.45 ± 0.08              | n.a.                                       | 86 ± 2                | 7                                    |
| <b>wt<br/>GPR55</b>          | Gα <sub>12</sub>            | 13 ± 5                           | ML184   | n.d.                     | n.a.                                       | n.d.                  | 4                                    |
|                              |                             |                                  | LPI     | n.d.                     | n.a.                                       | n.d.                  | 4                                    |
| <b>Cryo-EM<br/>construct</b> | Gα <sub>13</sub>            | 49 ± 6                           | ML184   | 7.74 ± 0.03              | 0.0010                                     | 86 ± 2                | 5                                    |
|                              |                             |                                  | LPI     | 7.40 ± 0.06              | 0.9968                                     | 82 ± 4                | 5                                    |
| <b>T176A</b>                 | Gα <sub>13</sub>            | 50 ± 1                           | ML184   | 7.11 ± 0.08              | 0.0377                                     | 100 ± 1               | 4                                    |
|                              |                             |                                  | LPI     | 6.96 ± 0.02              | 0.0001                                     | 87 ± 2                | 4                                    |
| <b>R253A</b>                 | Gα <sub>13</sub>            | 13 ± 3                           | ML184   | 7.84 ± 0.08              | 0.0005                                     | 103 ± 3               | 3                                    |
|                              |                             |                                  | LPI     | 5.17 ± 0.09              | <0.0001                                    | 37 ± 2                | 3                                    |
| <b>N171Q</b>                 | Gα <sub>13</sub>            | 19 ± 2                           | ML184   | 5.85 ± 0.07              | <0.0001                                    | 76 ± 2                | 3                                    |
|                              |                             |                                  | LPI     | 6.72 ± 0.08              | <0.0001                                    | 85 ± 3                | 3                                    |
| <b>N171A</b>                 | Gα <sub>13</sub>            | 16 ± 3                           | ML184   | 5.98 ± 0.04              | <0.0001                                    | 73 ± 3                | 3                                    |
|                              |                             |                                  | LPI     | 6.61 ± 0.06              | <0.0001                                    | 85 ± 3                | 3                                    |
| <b>G152F</b>                 | Gα <sub>13</sub>            | 52 ± 3                           | ML184   | 7.66 ± 0.06              | 0.0375                                     | 108 ± 3               | 3                                    |
|                              |                             |                                  | LPI     | 6.79 ± 0.02              | <0.0001                                    | 94 ± 3                | 3                                    |
| <b>G152W</b>                 | Gα <sub>13</sub>            | 41 ± 2                           | ML184   | 8.87 ± 0.01 <sup>‡</sup> | <0.0001                                    | 107 ± 1               | 3                                    |
|                              |                             |                                  | LPI     | 7.00 ± 0.03              | 0.0009                                     | 96 ± 5                | 3                                    |
| <b>TBXA2</b>                 | Gα <sub>13</sub>            | -15 ± 14                         | U-46619 | 9.03 ± 0.11              | n.a.                                       | 100 ± 2               | 3                                    |
|                              | Gα <sub>12</sub>            | -6 ± 15                          | U-46619 | 7.62 ± 0.15              | n.a.                                       | 100 ± 8               | 3                                    |
|                              | Gα <sub>13</sub> -<br>L374I | 17 ± 3                           | ML184   | 7.44 ± 0.05              | 0.8504                                     | 84 ± 1                | 3                                    |
|                              |                             |                                  | LPI     | 7.09 ± 0.07              | 0.0121                                     | 71 ± 3                | 3                                    |
| <b>wt</b>                    | Gα <sub>13</sub> -<br>Q373D | 33 ± 11                          | ML184   | 7.77 ± 0.04              | 0.0058                                     | 94 ± 7                | 3                                    |
|                              |                             |                                  | LPI     | 7.28 ± 0.01              | 0.3500                                     | 84 ± 8                | 3                                    |
| <b>GPR55</b>                 | Gα <sub>13</sub> -<br>H368Q | 64 ± 8                           | ML184   | 7.53 ± 0.09              | 0.3466                                     | 101 ± 4               | 3                                    |
|                              |                             |                                  | LPI     | 7.45 ± 0.03              | >0.9999                                    | 88 ± 6                | 3                                    |
|                              | Gα <sub>13</sub> -<br>R331D | 27 ± 7                           | ML184   | 7.47 ± 0.10              | 0.6846                                     | 89 ± 3                | 3                                    |
|                              |                             |                                  | LPI     | 6.92 ± 0.01              | 0.0005                                     | 80 ± 4                | 3                                    |

\*The degree of activation in % was calculated by normalization of BRET<sup>2</sup> ratios (BRET<sup>2</sup> ratio of 30 μM ligand for efficacy or basal BRET<sup>2</sup> ratios of 1.5% DMSO) to the respective BRET<sup>2</sup> ratios for the wt GPR55 plus G<sub>13</sub>-biosensor at 30 μM ML184 (100% activation) and for a mock-transfection plus G<sub>13</sub>-biosensor (0% activation). The same normalization approach was used for the Gα<sub>13</sub> mutants.

<sup>†</sup>P values were calculated by one-way ANOVA with Dunnett's post-hoc test for all mutants versus wt GPR55 separately for each ligand (seven comparisons each). The ANOVA P values equal <0.0001 for both ligand comparisons. The Gα<sub>13</sub> mutants were tested independently versus wt GPR55 plus wt Gα<sub>13</sub>. Here, the ANOVA P value equals 0.0237 for the ML184 comparison and 0.0008 for the LPI comparison, respectively.

<sup>‡</sup>The pEC<sub>50</sub> value of ML184 at GPR55 mutant G152W was calculated by extrapolating ΔBRET<sup>2</sup> ratios for concentrations <0.3 nM. n.d.: not determined. n.a. not applicable



**Supplementary Table S4.** GPCR structures with resolved N- or O-linked glycosylation in the PDB as of July 2024.

| PDB ID                                                                 | Receptor                              | Ligand distance within 5 Å | Residue(s)               | Location               | Glycan units       |
|------------------------------------------------------------------------|---------------------------------------|----------------------------|--------------------------|------------------------|--------------------|
| <b>Class A GPCRs</b>                                                   |                                       |                            |                          |                        |                    |
| <b>9GE2, 9GE3 (this publication)</b>                                   | <b>GPR55</b>                          | <b>Yes</b>                 | <b>N171</b>              | <b>ECL2</b>            | <b>1-2</b>         |
| 2J4Y, 3C9M, 3PQR, 6FKB, 6FUF, 7ZBC, 7ZBE                               | Rhodopsin                             | no                         | N2<br>N15                | <i>N</i> -term         | 0-1<br>1-4         |
| 3V2W, 3V2Y, 7EVY, 7TD3, 7TD4                                           | S1PR <sub>1</sub>                     | no                         | N30                      | <i>N</i> -term         | 1                  |
| 7YXA                                                                   | S1PR <sub>5</sub>                     | no                         | N20                      | <i>N</i> -term         | 1                  |
| 7SRQ, 7SRS                                                             | Serotonin 5-HT <sub>2B</sub> receptor | no                         | N204                     | ECL2                   | 1                  |
| 6DO1, 6OS2                                                             | Angiotensin II receptor type 1        | no                         | N176                     | ECL2                   | 1                  |
| 6MEO                                                                   | Chemokine receptor type 5             | no                         | S7                       | <i>N</i> -term         | 1                  |
| 7RKF                                                                   | US28                                  | no                         | N9                       | <i>N</i> -term         | 1                  |
| <b>Class B GPCRs</b>                                                   |                                       |                            |                          |                        |                    |
| 5NX2, 6LN2                                                             | Glucagon-like peptide 1               | no                         | N63<br>N82               | <i>N</i> -term         | 0-1<br>2           |
| 5XEZ, 5XF1                                                             | Glucagon receptor                     | no                         | N46<br>N59<br>N74<br>N78 | <i>N</i> -term         | 1<br>2-3<br>2<br>2 |
| 7TYF, 7TYI, 7TYN, 7TYO, 7TYX, 7TYW, 7TZF, 8F0J, 8F0K, 8F2A, 8F2B, 9AUC | Calcitonin and Amylin 1-3 receptors   | no                         | N73<br>N125<br>N130      | <i>N</i> -term         | 0-1<br>0-1<br>1    |
| <b>Class C GPCRs</b>                                                   |                                       |                            |                          |                        |                    |
| 6N51, 6N52, 7FD8, 7FD9                                                 | Metabotropic glutamate receptor 5     | no                         | N210<br>N445             | <i>N</i> -term         | 1<br>0-1           |
| <b>Class F GPCRs</b>                                                   |                                       |                            |                          |                        |                    |
| 5L7D, 5L7I, 5V56, 7ZIO                                                 | Smoothed receptor                     | no                         | N188<br>N493             | <i>N</i> -term<br>6.74 | 0-1<br>0-1         |
